# Supplementary material for: Nanocrystalline MnO2on an activated carbon fiber for catalytic formaldehyde removal
Source: Royal Society of Chemistry journal article supplement (doi:10.1039/c6ra15463h), 2016-01-01
Supplement: c6ra15463h1.pdf [file c6ra15463h1.pdf]

# **Supplementary information for**

## **Nanocrystalline MnO<sub>2</sub> on Activated Carbon Fiber for**

### **Catalytic Formaldehyde Removal**

Zijian Dai <sup>a</sup>, Xiaowei Yu <sup>b</sup>, Chen Huang <sup>a</sup>, Meng Li <sup>a</sup>, Jiafei Su <sup>b</sup>, Yaping Guo <sup>b</sup>, He Xu<sup>b</sup>, Qinfei Ke, <sup>\*, b, a</sup>

a Key Laboratory of Textile Science & Technology (College of Textiles, Donghua University), Ministry of Education, Shanghai 201620, P. R. China. E-mail address: [kqf@dhu.edu.cn](mailto:kqf@dhu.edu.cn)

b Environmental Materials Research Center, Shanghai Normal University, Shanghai 200234, P. R. China

**Table S1. Summary of catalytic oxidation for formaldehyde removal at ambient temperature in recent literature.**

| Catalyst                             | Concentration | Temperature         | Test method                                                                                                 | Performance                                                                                              | Ref. |
|--------------------------------------|---------------|---------------------|-------------------------------------------------------------------------------------------------------------|----------------------------------------------------------------------------------------------------------|------|
| Pt/TiO <sub>2</sub><br>hollow chains | 260 ± 5 ppm   | Room<br>temperature | Organic glass box<br>reactor(4.4 L)<br>catalyst weight:<br>0.1 g                                            | HCHO decreased<br>to 17.2 ppm after<br>60 min with<br>R0.5Pt/TiO <sub>2</sub>                            | 29   |
| Eu/CeO <sub>2</sub>                  | 500 ppm       | 20-350 °C           | Tests were<br>performed in a<br>fixed-bed reactor<br>GHSV =30,000<br>mL · h <sup>-1</sup> · g <sup>-1</sup> | The complete<br>HCHO oxidation<br>of 4% Eu/CeO <sub>2</sub><br>nanosheets can<br>be obtained at<br>120°C | 30   |
|                                      |               |                     | Tests were                                                                                                  | 100% HCHO                                                                                                |      |

|                                                               |          |                          |                                                                                                                                       |                                                                                                                                                   |    |
|---------------------------------------------------------------|----------|--------------------------|---------------------------------------------------------------------------------------------------------------------------------------|---------------------------------------------------------------------------------------------------------------------------------------------------|----|
| manganese oxides with different crystal structures            | 170 ppm  | 50-200 °C                | performed in a fixed-bed quartz flow reactor (i.d. = 4 mm)<br>catalyst: 60 mg<br>GHSV = 100 000 mL (g <sub>cat</sub> h) <sup>-1</sup> | conversion occurs at 80 °C for δ-MnO <sub>2</sub> , 125 °C, 200 °C, and 150 °C for α-MnO <sub>2</sub> , β-MnO <sub>2</sub> and γ-MnO <sub>2</sub> | 6  |
| Pt/ceramics                                                   | 140 ppm  | Room temperature (25 °C) | Organic glass box reactor (6 L)<br>catalyst weight: 21 g (300 mesh)                                                                   | Best performance with 0.013 wt% Pt loaded at Pt/HC catalysts.                                                                                     | 31 |
| Pt/MnO <sub>2</sub>                                           | 460 ppm  | 20-200 °C                | Test in fixed-bed reactor;<br>catalyst: 0.1 g;<br>GHSV: 20 000 h <sup>-1</sup>                                                        | ~30% conversion of HCHO over 0.5-1 wt% Pt/MnO <sub>2</sub> 20 °C                                                                                  | 27 |
| Au <sub>0.5</sub> Pt <sub>0.5</sub> /MnO <sub>2</sub> /cotton | 460 ppm; | 20-200 °C                | Fixed-bed reactor; (length = 500 mm, diameter = 4 mm)<br>GHSV: 20 000 h <sup>-1</sup>                                                 | ~30% HCHO conversion over (Au <sub>0.5</sub> Pt <sub>0.5</sub> /MnO <sub>2</sub> )(20 wt%)/cotton at 40 °C<br>100% conversion at 120 °C           | 32 |
| MnO <sub>2</sub> /cellulose                                   | 100 ppm  | 60-180 °C                | Tests were performed in a fixed-bed quartz flow reactor (length = 300 mm,                                                             | 100 % conversion with 8.86% loading amount in MnO <sub>2</sub> /cellulose at 140 °C                                                               |    |

|                     |         |             |                                 |                               |    |
|---------------------|---------|-------------|---------------------------------|-------------------------------|----|
|                     |         |             | diameter = 4 mm)                | ~16.7%                        | 13 |
|                     |         |             | GHSV = 50 000 <sup>-1</sup>     | conversion at                 |    |
|                     |         |             |                                 | 60 °C                         |    |
|                     |         |             | Performed with a                | 100% HCHO                     |    |
|                     |         |             | fixed-bed quartz                | conversion was                |    |
|                     |         |             | flow reactor                    | attained in the               |    |
|                     |         |             | (length = 300 mm,               | space velocity of             |    |
|                     |         |             | diameter = 4 mm)                | GHSV = 50,000                 |    |
|                     |         | Room        | GHSV: 50,000,                   | h <sup>-1</sup> , and about   |    |
| Pt/TiO <sub>2</sub> | 100 ppm | temperature | 100,000, 200,000                | 97% and 58%                   | 33 |
|                     |         | (25 °C)     | h <sup>-1</sup> by changing the | HCHO                          |    |
|                     |         |             | used catalyst                   | conversion in the             |    |
|                     |         |             | volume                          | space velocity of             |    |
|                     |         |             |                                 | GHSV = 100,000                |    |
|                     |         |             |                                 | and 200,000 h <sup>-1</sup> , |    |

### Content of $\delta$ -MnO<sub>2</sub>.

**Table S2. Preparation of MnO<sub>2</sub>/ACF.**

| Sample                     | Conc. of KMnO <sub>4</sub><br>solution (mol L <sup>-1</sup> ) | Conc. of MnSO <sub>4</sub><br>solution (mol L <sup>-1</sup> ) | MnO <sub>2</sub> content in<br>MnO <sub>2</sub> /ACF (wt.%) |
|----------------------------|---------------------------------------------------------------|---------------------------------------------------------------|-------------------------------------------------------------|
| 0.01-MnO <sub>2</sub> /ACF | 0.013                                                         | 0.010                                                         | 5.62                                                        |
| 0.02-MnO <sub>2</sub> /ACF | 0.026                                                         | 0.020                                                         | 11.74                                                       |
| 0.03-MnO <sub>2</sub> /ACF | 0.040                                                         | 0.030                                                         | 16.12                                                       |
| 0.04-MnO <sub>2</sub> /ACF | 0.052                                                         | 0.040                                                         | 22.42                                                       |
| 0.05-MnO <sub>2</sub> /ACF | 0.066                                                         | 0.050                                                         | 29.33                                                       |

Results illustrated that the amount of  $\delta$ -MnO<sub>2</sub> NPs attached in MnO<sub>2</sub>/ACF was determined by the initial concentration of MnSO<sub>4</sub> and KMnO<sub>4</sub> solution. By altering

the concentration of  $\text{MnSO}_4$  and  $\text{KMnO}_4$  solution, different  $\text{MnO}_2$  contents of  $\text{MnO}_2/\text{ACF}$  could be obtained. With the increasing of the concentration of  $\text{MnSO}_4$  and  $\text{KMnO}_4$  solution, the content of  $\delta\text{-MnO}_2$  was increasing.

### Calculation of formaldehyde removal amount

The removal capacity of formaldehyde was calculated according to the following equation (equation [1]):

where  $W$  is the removal amount of formaldehyde per unit weight of adsorbent (mol/g),  $P$  is atmospheric pressure (1 atm),  $V$  is volume of removal formaldehyde at 80% breakthrough time which was calculated from the integrated area over breakthrough curve  $\times 10^{-6} \times 0.2$  L/min,  $R$  is universal gas constant ( $0.08204 \text{ atm} \times \text{mol}^{-1} \times \text{K}^{-1}$ ),  $T$  is operating temperature (298.15 K), and  $m$  is mass of adsorbent.

Finally,  $W$  was converted to weight percentage of removed formaldehyde per unit weight of adsorbent and labelled as  $W_0$  (mg/g).

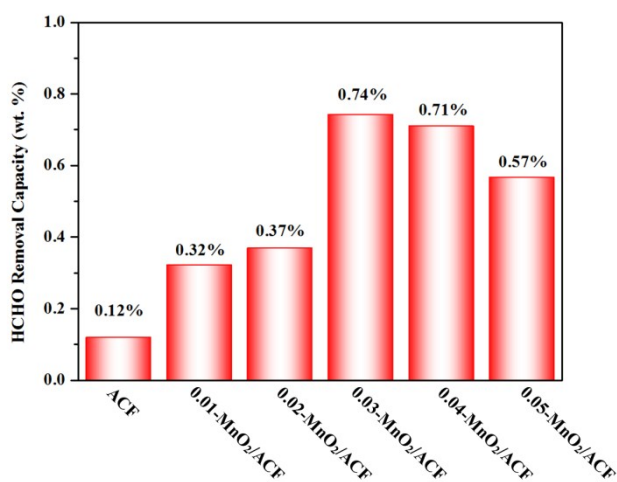

Fig. S1 HCHO removal capacities of ACF and  $\text{MnO}_2/\text{ACF}$  samples.

## References

[S1] Song Y, Qiao W, Yoon S-H, Mochida I, Guo Q, Liu L. Removal of formaldehyde at low concentration using various activated carbon fibers. *J Appl Polym Sci* 2007;106(4):2151-2157.
